# Supplementary material for: Hypoxic in vitro culture reduces histone lactylation and impairs pre-implantation embryonic development in mice
Source: PubMed Central journal article supplement (PMC8691063; doi:10.1186/s13072-021-00431-6), 2021-12-21
Supplement: 13072_2021_431_MOESM4_ESM.pdf [file 13072_2021_431_MOESM4_ESM.pdf]

A

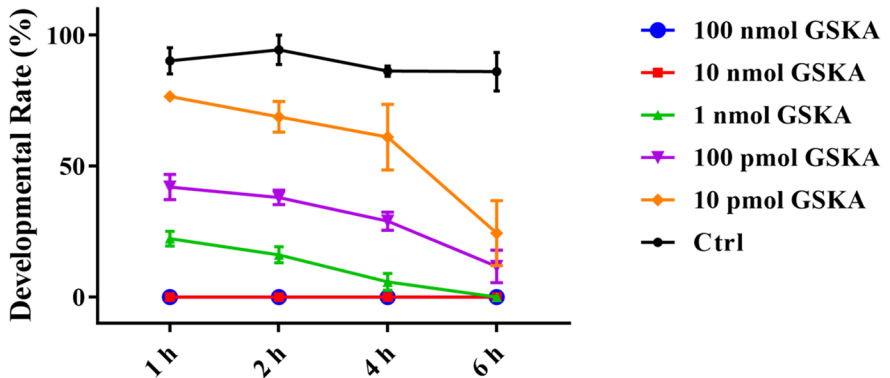

**Figure S4** Assessment of the developmental inhibitory effect of GSKA

**a** Morula stage embryos (72 hpi) were cultured with 100 nmol, 10 nmol, 1 nmol, 100 pmol, or 10 pmol of GSKA for 1, 2, 4 and 6 hours, respectively. The embryos were then transferred into drug-free medium to culture till blastocyst stage. Blastocyst developmental rates were determined relative to the starting morula stage embryo numbers (more than 120 morula stage embryos obtained from 3 independent experiments were tested in each group). Error bars indicates SEM.
